# Supplementary material
Source: PubMed Central journal article supplement (PMC7162695)
Supplement: NIHMS1568997-supplement-7.pdf [file NIHMS1568997-supplement-7.pdf]

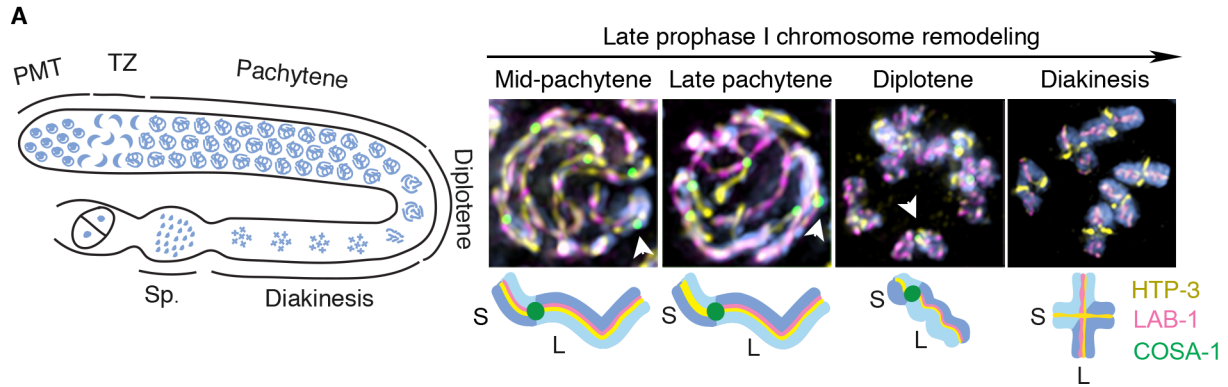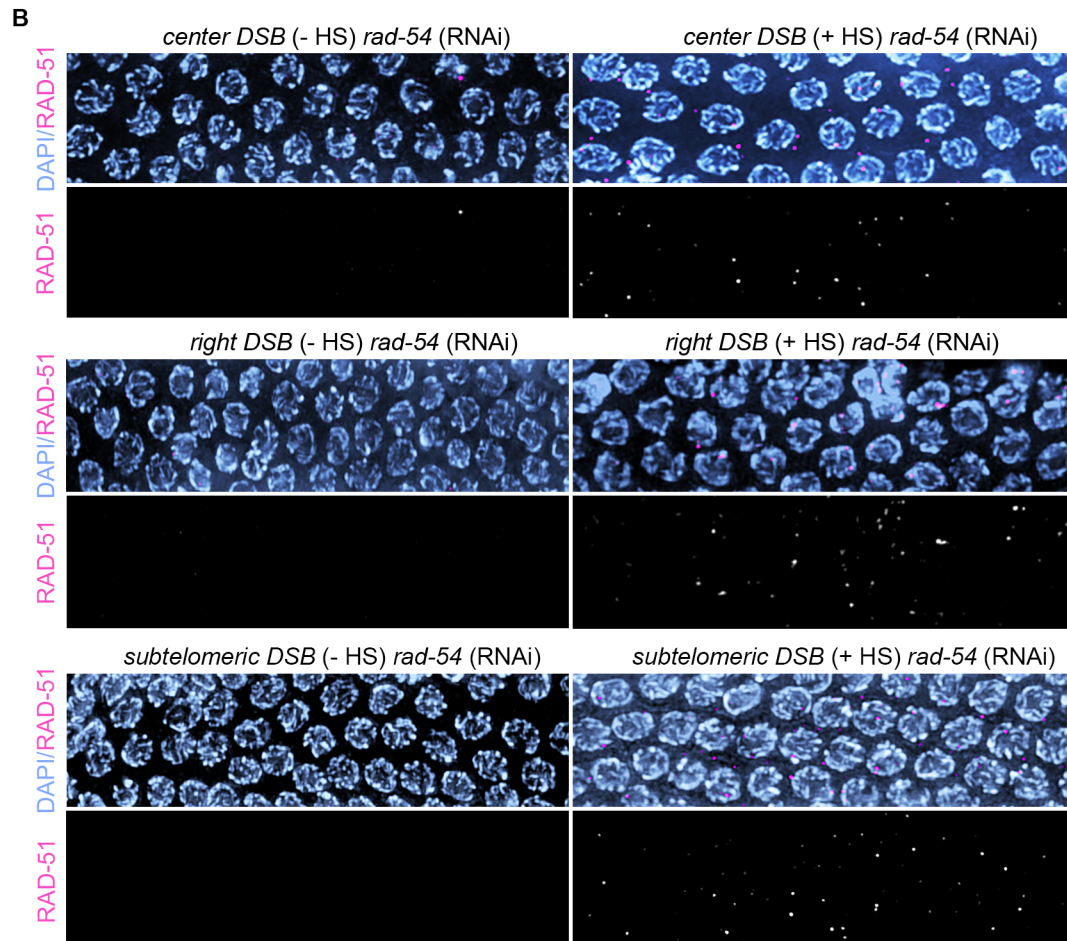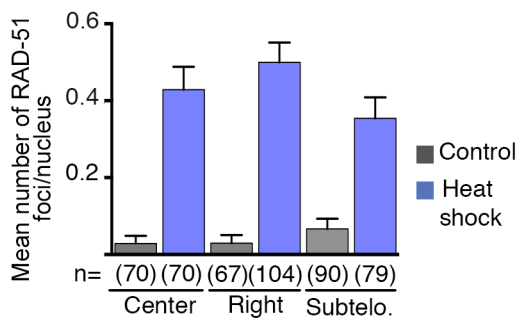

| Comparison                                       | P value        |
|--------------------------------------------------|----------------|
| Center III DSB (-HS) vs Center III DSB (+HS)     | <0.0001 (****) |
| Right III DSB (-HS) vs Right III DSB (+HS)       | <0.0001 (****) |
| Subtelo. III DSB (-HS) vs Subtelo. III DSB (+HS) | <0.0001 (****) |
| Center III DSB (+HS) vs Right III DSB (+HS)      | 0.3556 (n.s.)  |
| Center III DSB (+HS) vs Subtelo. III DSB (+HS)   | 0.4250 (n.s.)  |
| Right III DSB (+HS) vs Subtelo. III DSB (+HS)    | 0.0644 (n.s.)  |

**Figure S1. Genomic *Mos1* transposon insertion sites and assessment of DSB and bivalent formation post heat shock-induced *Mos1* excision. Related to Figure 1.**

**(A)** Illustration of a *C. elegans* gonad and immunofluorescence images of individual germline nuclei undergoing chromosome remodeling. Nuclei at the premeiotic tip (PMT) are undergoing mitotic proliferation before entering meiosis at transition zone (TZ; leptotene/zygotene stages), followed by pachytene, diplotene and diakinesis. Sp indicates the spermatheca where oocytes are fertilized. Immunofluorescence images showing the progression of chromosome remodeling in wild-type nuclei from mid-pachytene through diakinesis. Illustrations in the bottom depict a single bivalent for simplicity. At mid-pachytene, CO precursor sites are marked by COSA-1 (green; 1 focus per chromosome; 6 foci per nucleus), and LAB-1 (magenta) fully co-localizes with the chromosome axes marker HTP-3 (yellow) along the length of the chromosomes. In late pachytene, LAB-1 localization is restricted to the long arm of the chromosomes (L), which is separated by the CO site (marked by the COSA-1 focus, white arrow) from the short arm (S). During diplotene, chromosomes undergo condensation, and at diakinesis, 6 cruciform-shaped bivalents with LAB-1 only on the long arm (L) are visible. **(B)** DSBs are generated by heat shock-induced *Mos1* excision and marked by the DNA repair protein RAD-51 (magenta). Images show germline nuclei at pachytene in animals subjected to *rad54*(RNAi) and carrying a *Mos1* insertion at the center, off-center (right arm) and subtelomeric position of chromosome III either without (left; -HS) or with heat shock (right, +HS). Histogram at the bottom shows the mean number of RAD-51 foci observed in mid-pachytene nuclei, control= -HS, n= number of nuclei scored. Only RAD-51 foci overlapping with DAPI were quantified. Error bars represent SEM. Table indicates statistical analysis results for the indicated pairwise comparisons by the two-tailed Mann-Whitney test, 95% C.I.

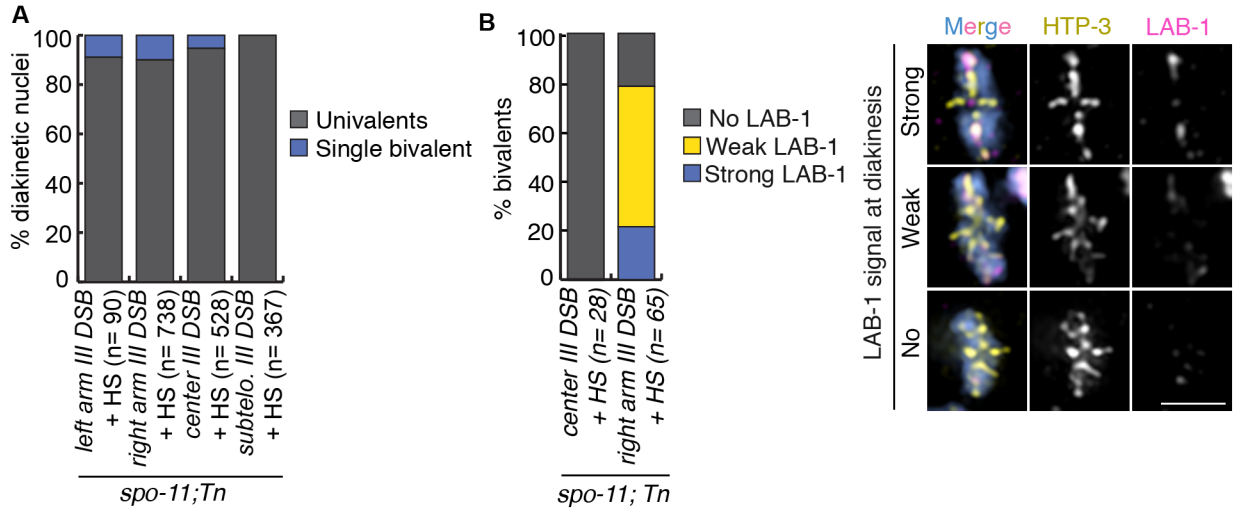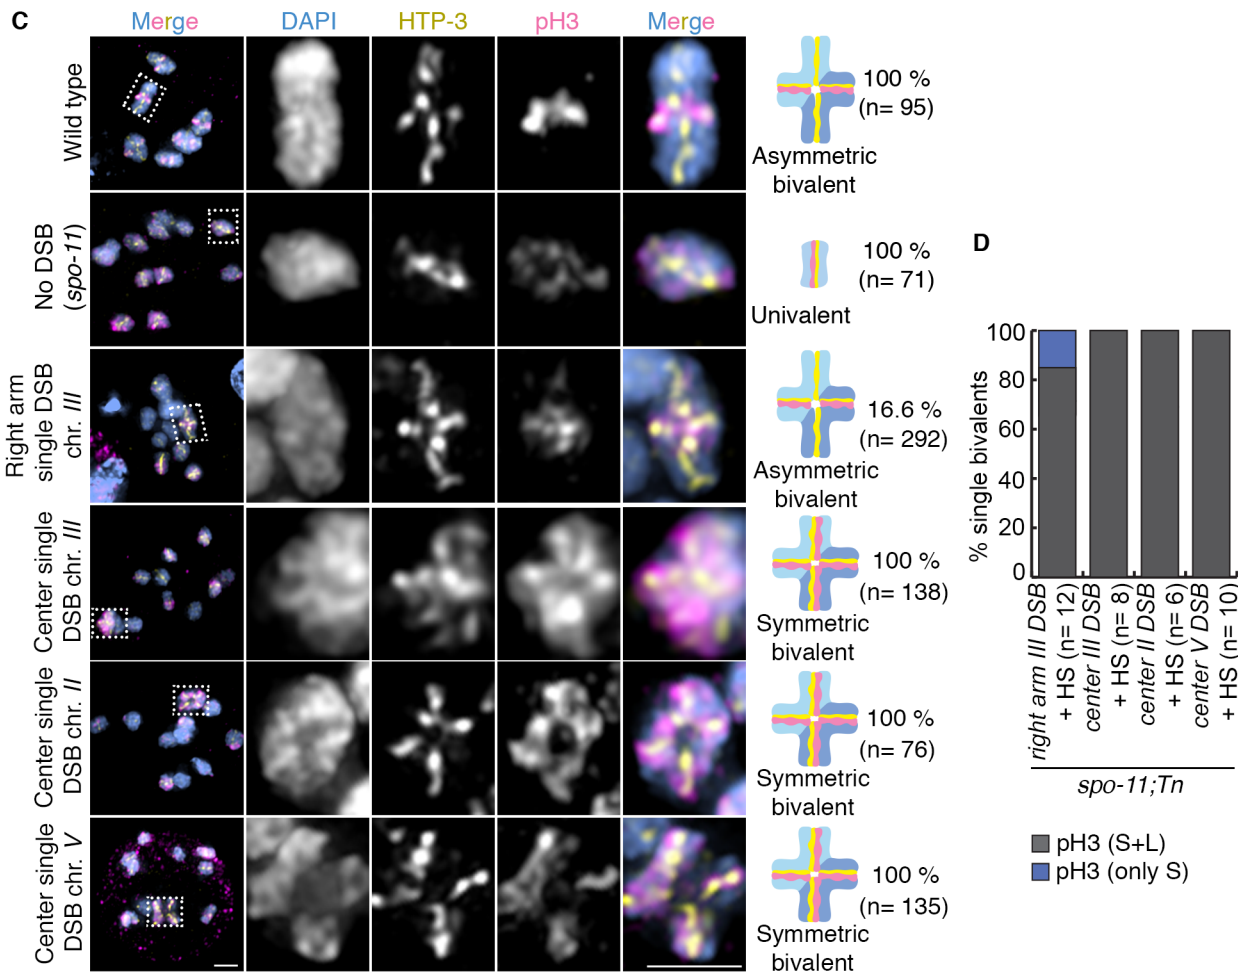

**Figure S2: Chromosome remodeling and phosphorylation of Histone H3 on the short arms of the chromosomes are affected by the position of the crossover. Related to Figure 1.**

**(A)** Quantification of bivalent formation after heat shock induced *Mos1* excision at the indicated positions on chromosome *III*. n= number of diakinesis nuclei scored. **(B)** Quantification and immunofluorescence images of the LAB-1 localization detected on bivalents following *Mos1* excision from the indicated positions on chromosome *III*. Both weak and strong signal was observed for LAB-1 as indicated. n = number of bivalents scored. **(C)** Immunofluorescence images of phosphorylated histone H3 (pH3; magenta) and HTP-3 (yellow) localization on DAPI-stained chromosomes (blue) in oocytes at diakinesis. Dashed boxes indicate the bivalents shown at higher magnification. n= number of diakinesis nuclei scored. Bar, 2  $\mu$ m. **(D)** Quantification of the localization pattern of pH3 on the observed bivalents. n = number of bivalents scored.



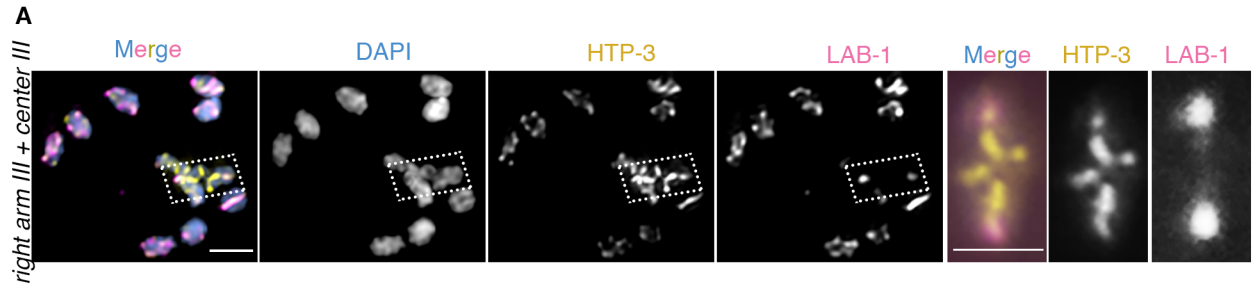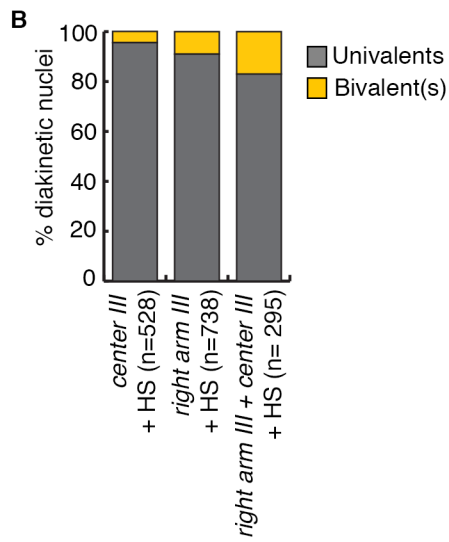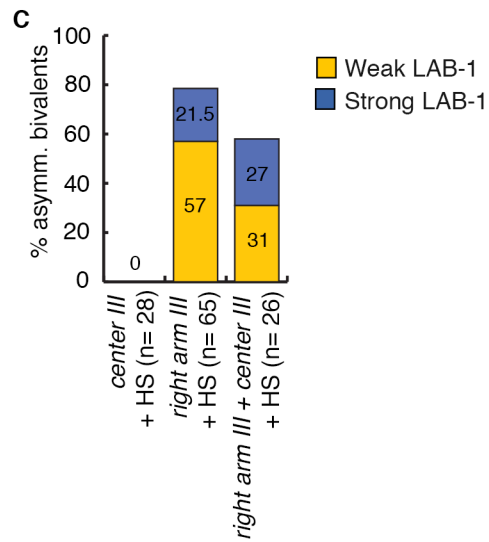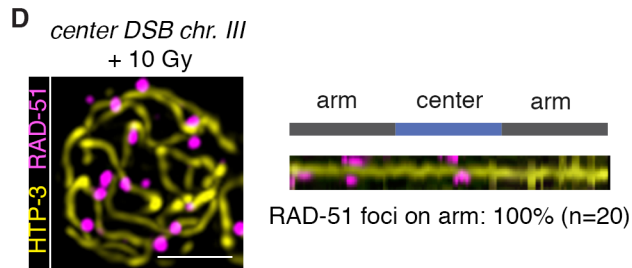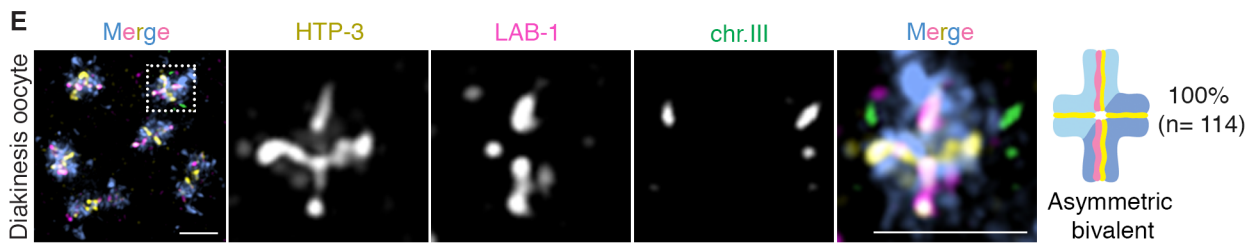

**Figure S3: Bivalent formation and LAB-1 localization in worms carrying two *MosI* sites and after exposure to exogenous DSBs. Related to Figure 3.**

**(A)** Immunostaining of chromosomes in diakinetically oocytes of worms harboring two *MosI* transposon insertion sites, one at the center and another at the right arm of chromosome *III*. Dashed box shows the asymmetric bivalent depicted at higher magnification on the right with LAB-1 (magenta) on the long arm and HTP-3 (yellow) in both axes. High-magnification image has not been deconvolved (processed) to show the LAB-1 signal extends along the long arm but is lost during image processing due to the stronger signal at the ends. Bar, 2  $\mu$ m. **(B)** Quantification of bivalent frequency upon heat shock. n = number of diakinesis nuclei scored. **(C)** Quantification of both weak and strong signal observed for LAB-1 on asymmetric bivalents following *MosI* excision from the indicated positions on chromosome *III*. Numbers in columns indicate observed percentages. n = number of bivalents scored. **(D)** Representative image of a pachytene nucleus exposed to IR (10 Gy) after heat shock-induced DSB formation at the center of chromosome *III*. Chromosome axes are marked with HTP-3 (yellow) and sites undergoing DSB repair following DSB formation are marked with RAD-51 (magenta). A computationally straightened chromosome is shown horizontally on the right. Chromosome axis length was divided into thirds to assess RAD-51 foci formation at chromosome arms (see schematic drawing). n value reflects the number of nuclei from which chromosomes have been computationally straightened. Bar, 2  $\mu$ m. **(E)** Diakinesis nuclei exposed to 10 Gy after heat shock induced DSB formation at chromosome *III* center. HTP-3 (yellow), LAB-1 (magenta) and chromosome *III* FISH probe (green). Bar, 2  $\mu$ m.

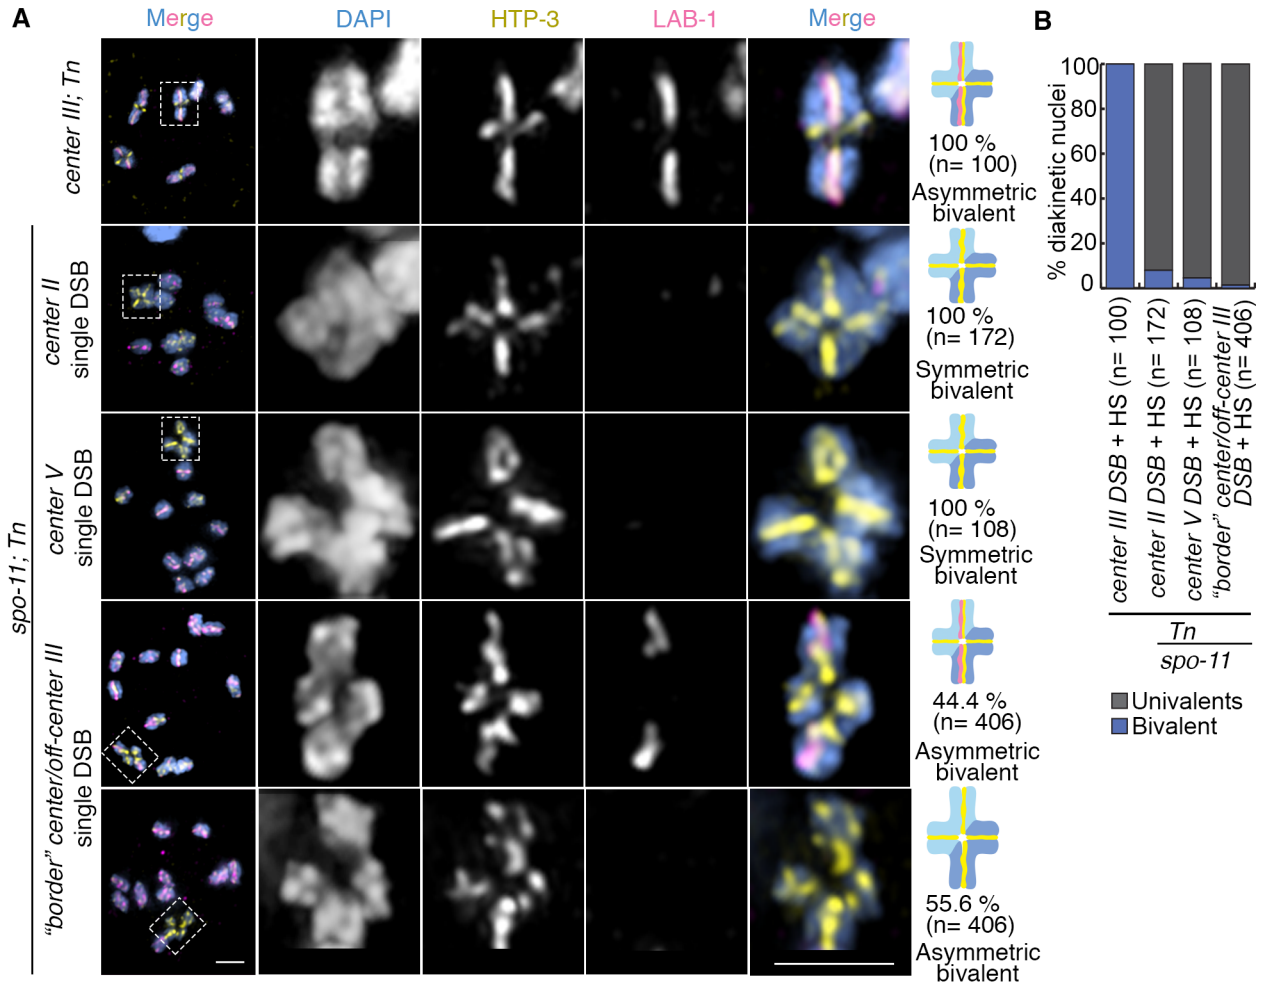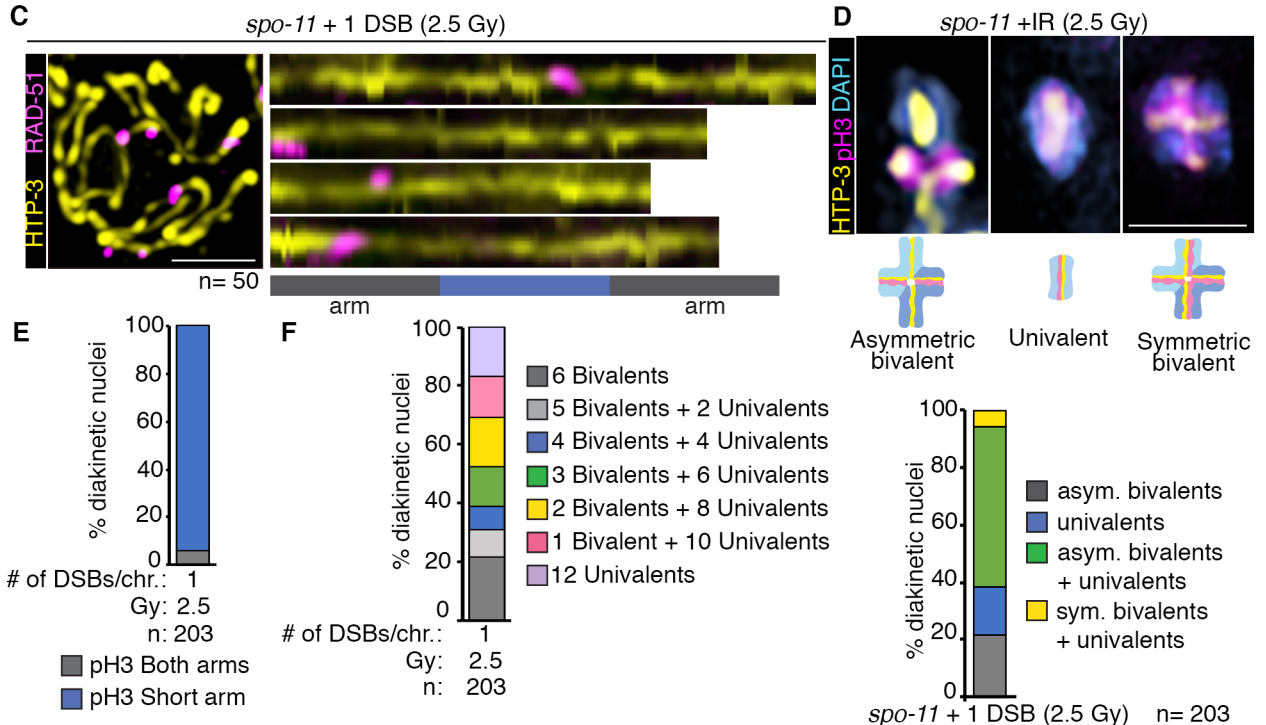

**Figure S4: Chromosome remodeling defects following a centered DSB/CO are a global feature of autosomes and pH3 localization after induction of DSB by  $\gamma$ -IR. Related to Figure 4.**

**(A)** Immunofluorescence images of diakinesis nuclei from the indicated genotypes. Dashed boxes show the DAPI-stained bodies depicted at higher magnification on the right accompanied by illustrations of the merge images. Top row shows the control line harboring the *Mos1* transposon at the center of chromosome *III* and the transposase (Tn) in a *spo-11+* background, with LAB-1 restricted only to the long arm of the bivalent. The following two rows depict the lack of LAB-1 localization observed for single bivalents obtained by heat shock-induced *Mos1* excision at the center of chromosomes *II* and *V*. The two bottom rows show that when a DSB is induced at a position close to the border between the center region and the arms (defined based on the genetic map) on chromosome *III*, two types of bivalents were observed: either carrying the restricted localization of LAB-1 along the long arms, as in wild type, or lacking LAB-1, as observed when the DSB is induced in the physical middle of the chromosome. HTP-3 (yellow), LAB-1 (magenta) and DAPI-stained chromosomes (blue). n= number of diakinesis oocytes scored. Bar, 2  $\mu$ m. **(B)** Histogram showing the percentage of oocytes at diakinesis observed carrying a bivalent after heat shock-induced *Mos1* excision at the center of chromosomes *III*, *II* and *V* and at the “border” between center/off-center regions of chromosome *III*. **(C)** Representative pachytene nucleus of *spo-11* mutant worm exposed to IR (2.5 Gy) inducing  $\sim$ 1 DSB per homologous chromosome pair. Computationally straightened chromosomes are displayed on the right. Chromosome axis is shown in yellow (HTP-3) and RAD-51 in magenta. n value indicates the number of nuclei from which chromosomes were straightened. Bar, 2  $\mu$ m. **(D)** Representative DAPI-stained bodies (blue) showing the localization of HTP-3 (yellow) and pH3 (magenta) observed in diakinesis nuclei of *spo-11* mutants subjected to a  $\gamma$ -IR dose (2.5 Gy) producing 1 DSB per chromosome pair. Illustrations are shown below the immunofluorescence images. Bar, 2  $\mu$ m. Histogram depicting the categories of bivalent/univalent configurations observed at diakinesis after exposure to indicated  $\gamma$ -IR dose. n= number of diakinesis nuclei examined. **(E)** Quantification of pH3 localization in diakinesis nuclei from *spo-11* mutants following exposure to 2.5 Gy. **(F)** Histogram showing quantification of the observed number of bivalents and/or univalents at 2.5 Gy.
